# Supplementary material for: Co-encapsulated astaxanthin and kaempferol nanoparticles: fabrication, characterization, and their potential synergistic effects on treating non-alcoholic fatty liver disease
Source: Royal Society of Chemistry journal article supplement (doi:10.1039/d3ra06537e), 2023-01-01
Supplement: d3ra06537e1.pdf [file d3ra06537e1.pdf]

## Supplementary material

### Co-encapsulated astaxanthin and kaempferol nanoparticles: Fabrication, characterization, and their potential synergistic effects on treating non-alcoholic fatty liver disease

Ho Thi Oanh,<sup>a</sup> Ngo Thi Hoai Thu,<sup>b</sup> Nguyen Van Hanh,<sup>b</sup> Mai Ha Hoang,<sup>\*a,c</sup> and Hoang Thi Minh Hien<sup>\*b,c</sup>

<sup>a</sup> Institute of Chemistry, Vietnam Academy of Science and Technology, 18 Hoang Quoc Viet street, Cau Giay, Ha Noi, Vietnam

<sup>b</sup> Institute of Biotechnology, Vietnam Academy of Science and Technology, 18 Hoang Quoc Viet street, Cau Giay, Ha Noi, Vietnam.

<sup>c</sup> Graduate University of Science and Technology, Vietnam Academy of Science and Technology, 18 Hoang Quoc Viet Street, Cau Giay, Ha Noi, Vietnam

#### Supplementary Figure

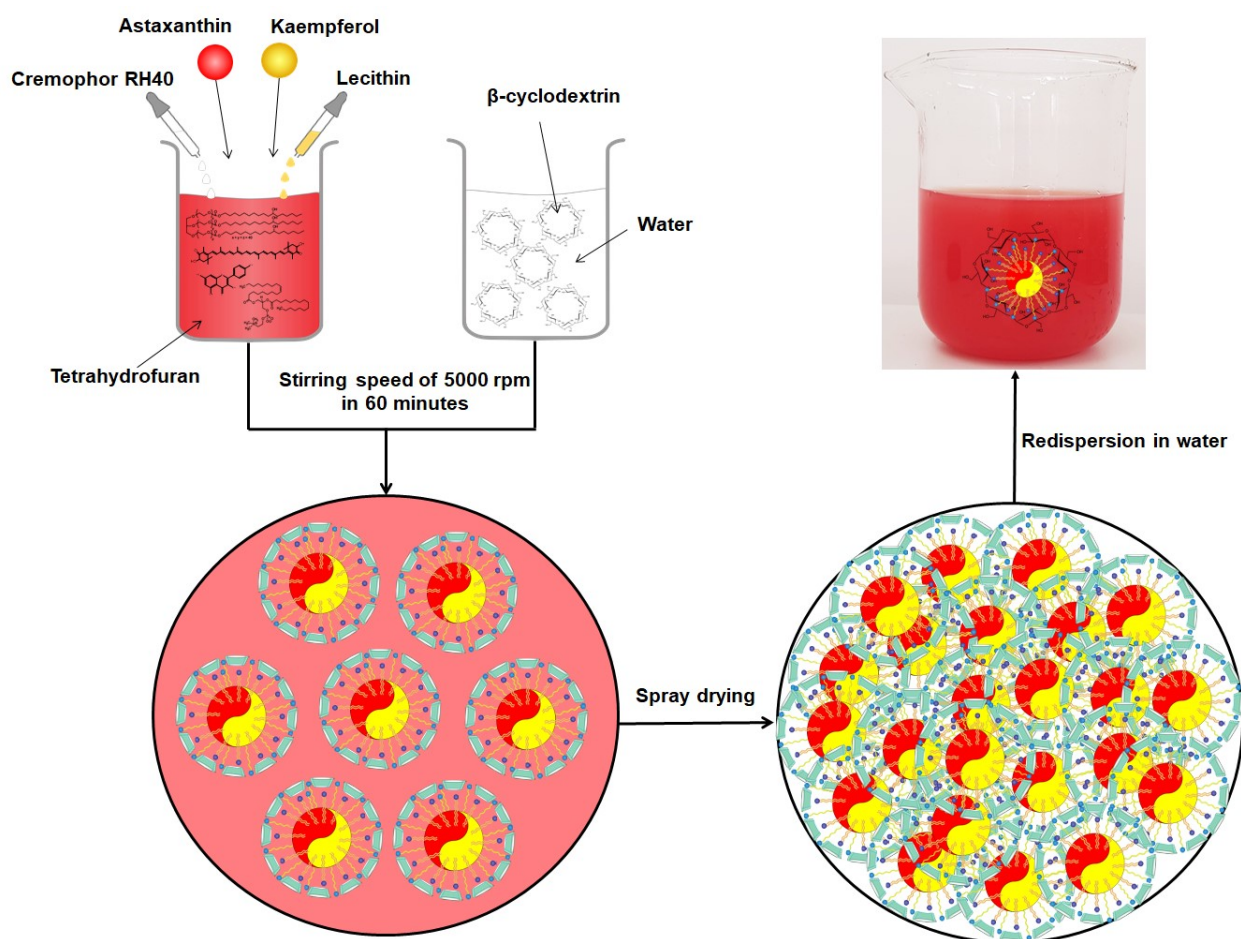

Fig. S1 Schematic illustration of astaxanthin/kaempferol nanoparticles formation

**Supplementary Table****Table S1.** Primers used for qPCR.

| Gene             | Primer (5'-3') | Sequence                   |
|------------------|----------------|----------------------------|
| miNOS            | Forward        | AGAAGGAAATGGCTGCAGAA       |
|                  | Reverse        | GCTCGGCTTCCAGTATTGAG       |
| mTNF- $\alpha$   | Forward        | CCCAGATAGATGGGCTCAT        |
|                  | Reverse        | CAGGGACCTCTCTAATCA         |
| mIL-6            | Forward        | TGAACTCCTTCTCCACAAGCG      |
|                  | Reverse        | GCTCTTCTGGGAAGTAGACAG      |
| mGAPDH           | Forward        | CAACGAATTTGGCTACAGCAAC     |
|                  | Reverse        | ACTGTGAGGAGGGGAGATTCAG     |
| h $\beta$ -actin | Forward        | TGGCACCCAGCACAATGAA        |
|                  | Reverse        | CTAAGTCATAGCCGCCTAGAAGCA   |
| hLXR $\alpha$    | Forward        | CGGGCTTCCACTACAATGTT       |
|                  | Reverse        | CTTCTCGATCATGCCAGTT        |
| hCYP7A1          | Forward        | AACACCATTCCAGCGACTTTCT     |
|                  | Reverse        | GATTGCCTTCCAAGCTGACTTT     |
| hFAS             | Forward        | AGCTGCCAGAGTCGGAGAACTTG    |
|                  | Reverse        | CAAGAACTGCACGGAGGTGTTGG    |
| hSCD-1           | Forward        | TGGGTGGCTGCTTGTG           |
|                  | Reverse        | GCGTGGGCATGAAG             |
| hCTP-1           | Forward        | TGAGACCAAACAAAGTGATGATGCAG |
|                  | Reverse        | AGACGGTGGAAACAGAGGCTGAAG   |
| hSREBP-1c        | Forward        | CGGAGCCATGGATTGCACTTT      |

---

|                |         |                            |
|----------------|---------|----------------------------|
|                | Reverse | GATGCTCAGTGGCACTGACTCTTC   |
| hInsig-2a      | Forward | CGTTCTTGGTTACCATGTA        |
|                | Reverse | TGATGAGATTTTTCTGCGATAACTTT |
| hPPAR $\alpha$ | Forward | ACGGAAAGCCCACTCTGCCCTCTC   |
|                | Reverse | CTTGTCCTCCGCAGATTCTACATTCG |

---

(m), indicates mouse genes (h) indicates human genes;
